# Supplementary material for: DNA methylation-based classification and identification of bladder cancer prognosis-associated subgroups
Source: Springer Nature journal article supplement (doi:10.1186/s12935-020-01345-1), 2020-06-17

A

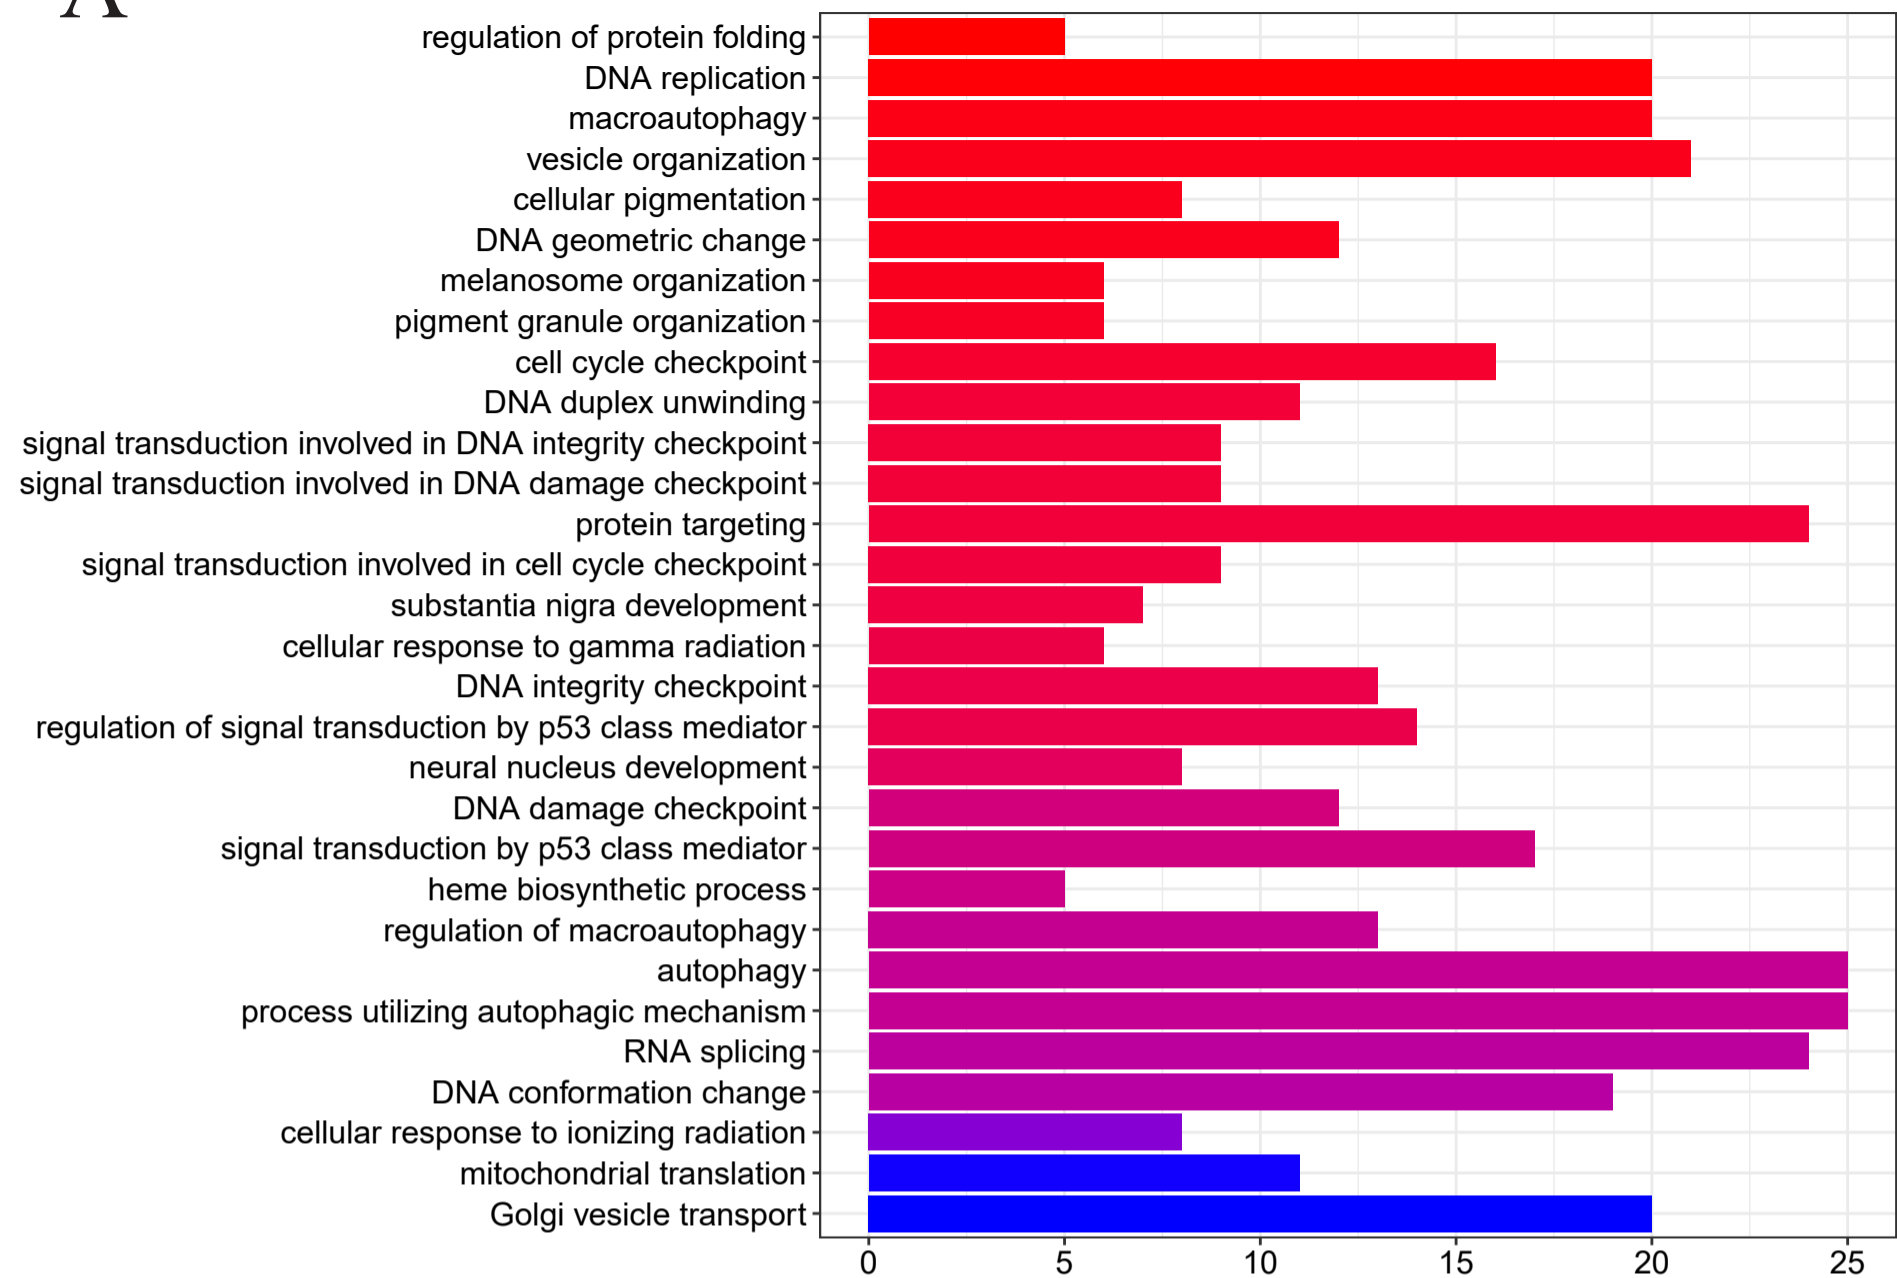

B

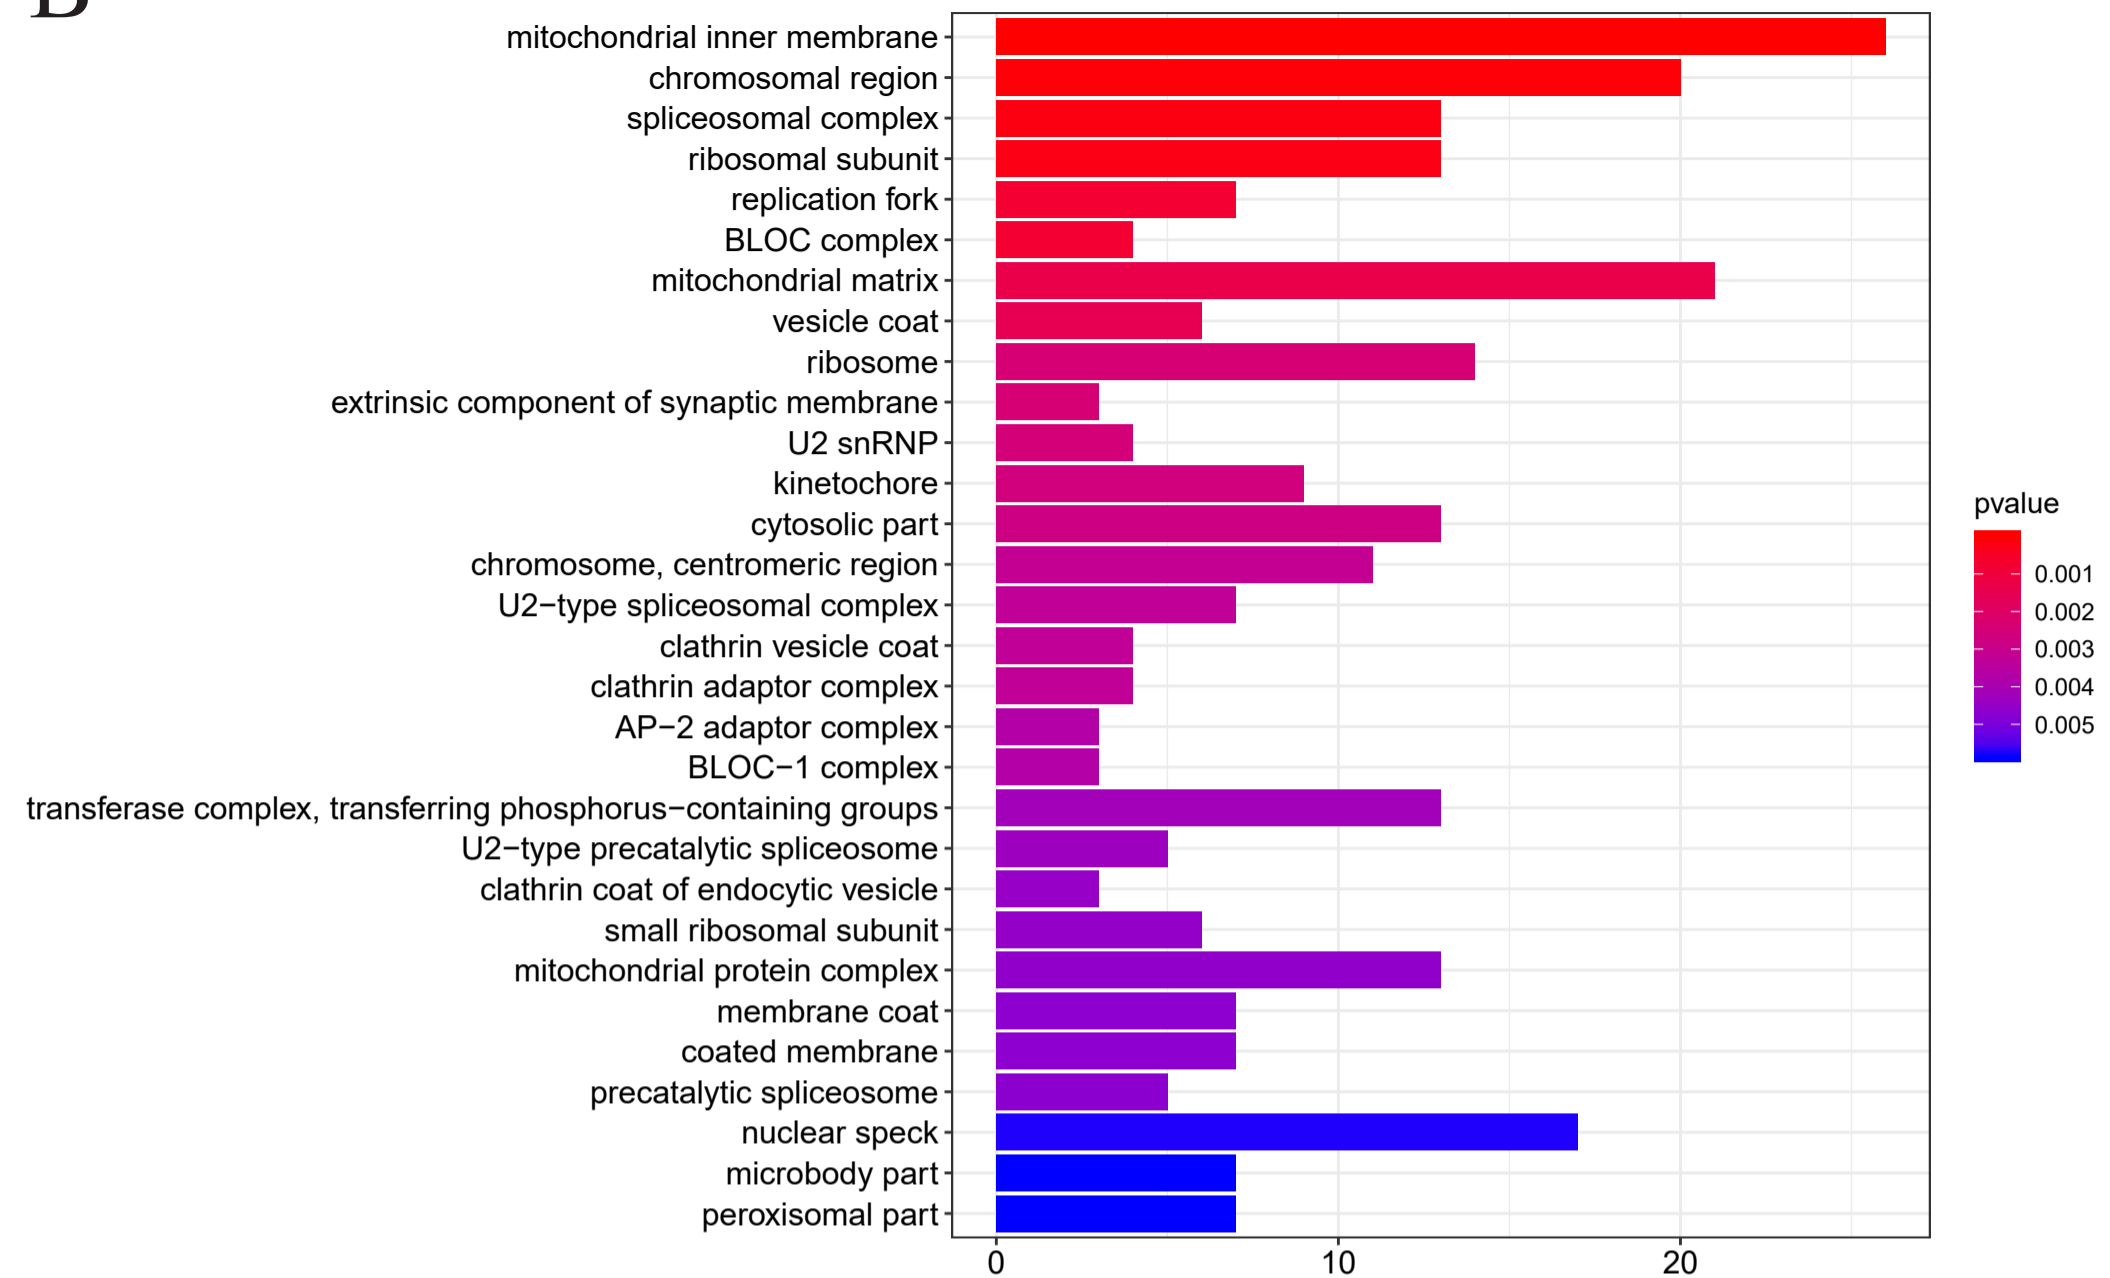

C

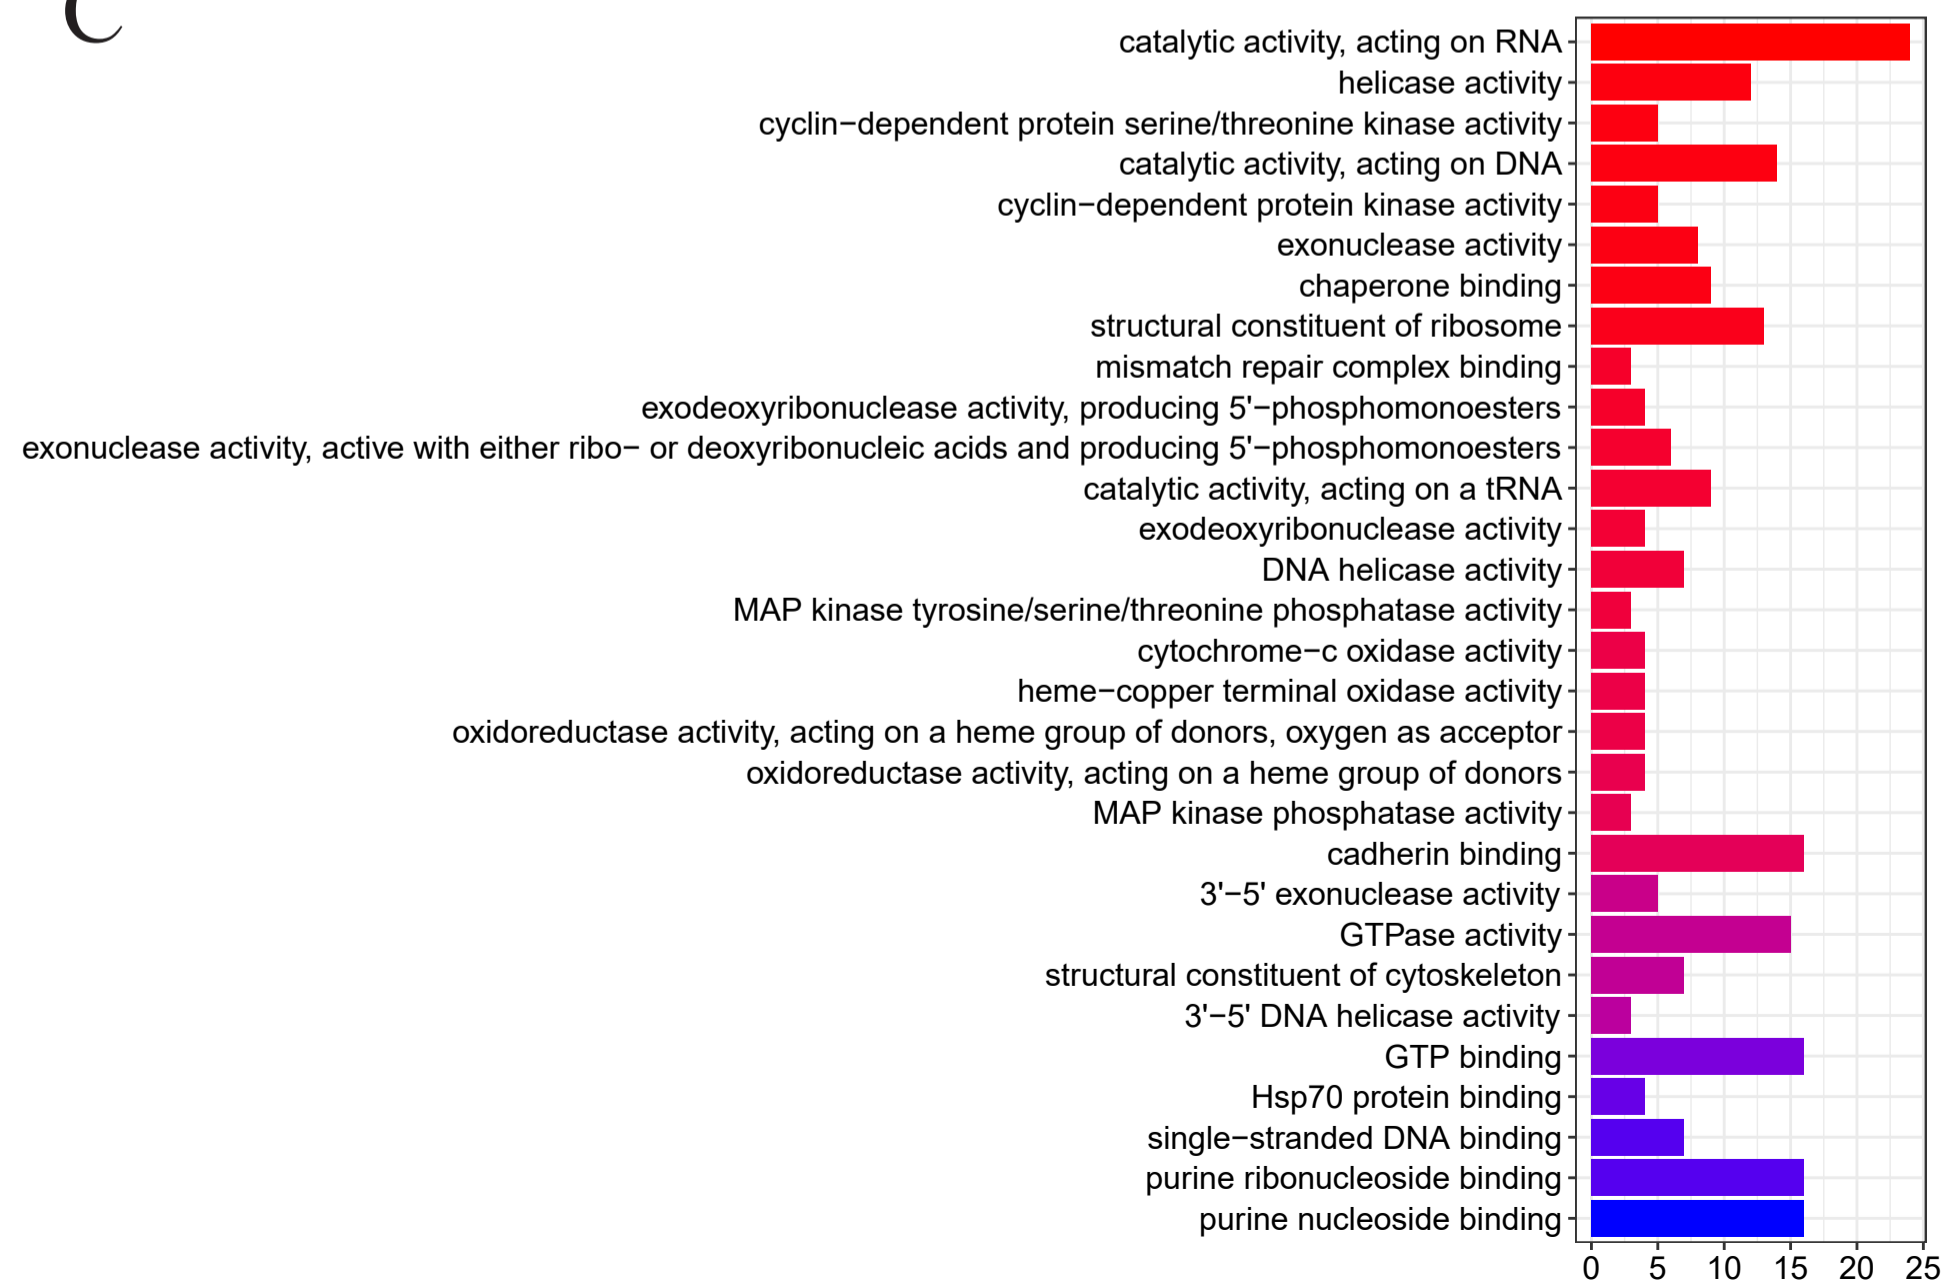

D

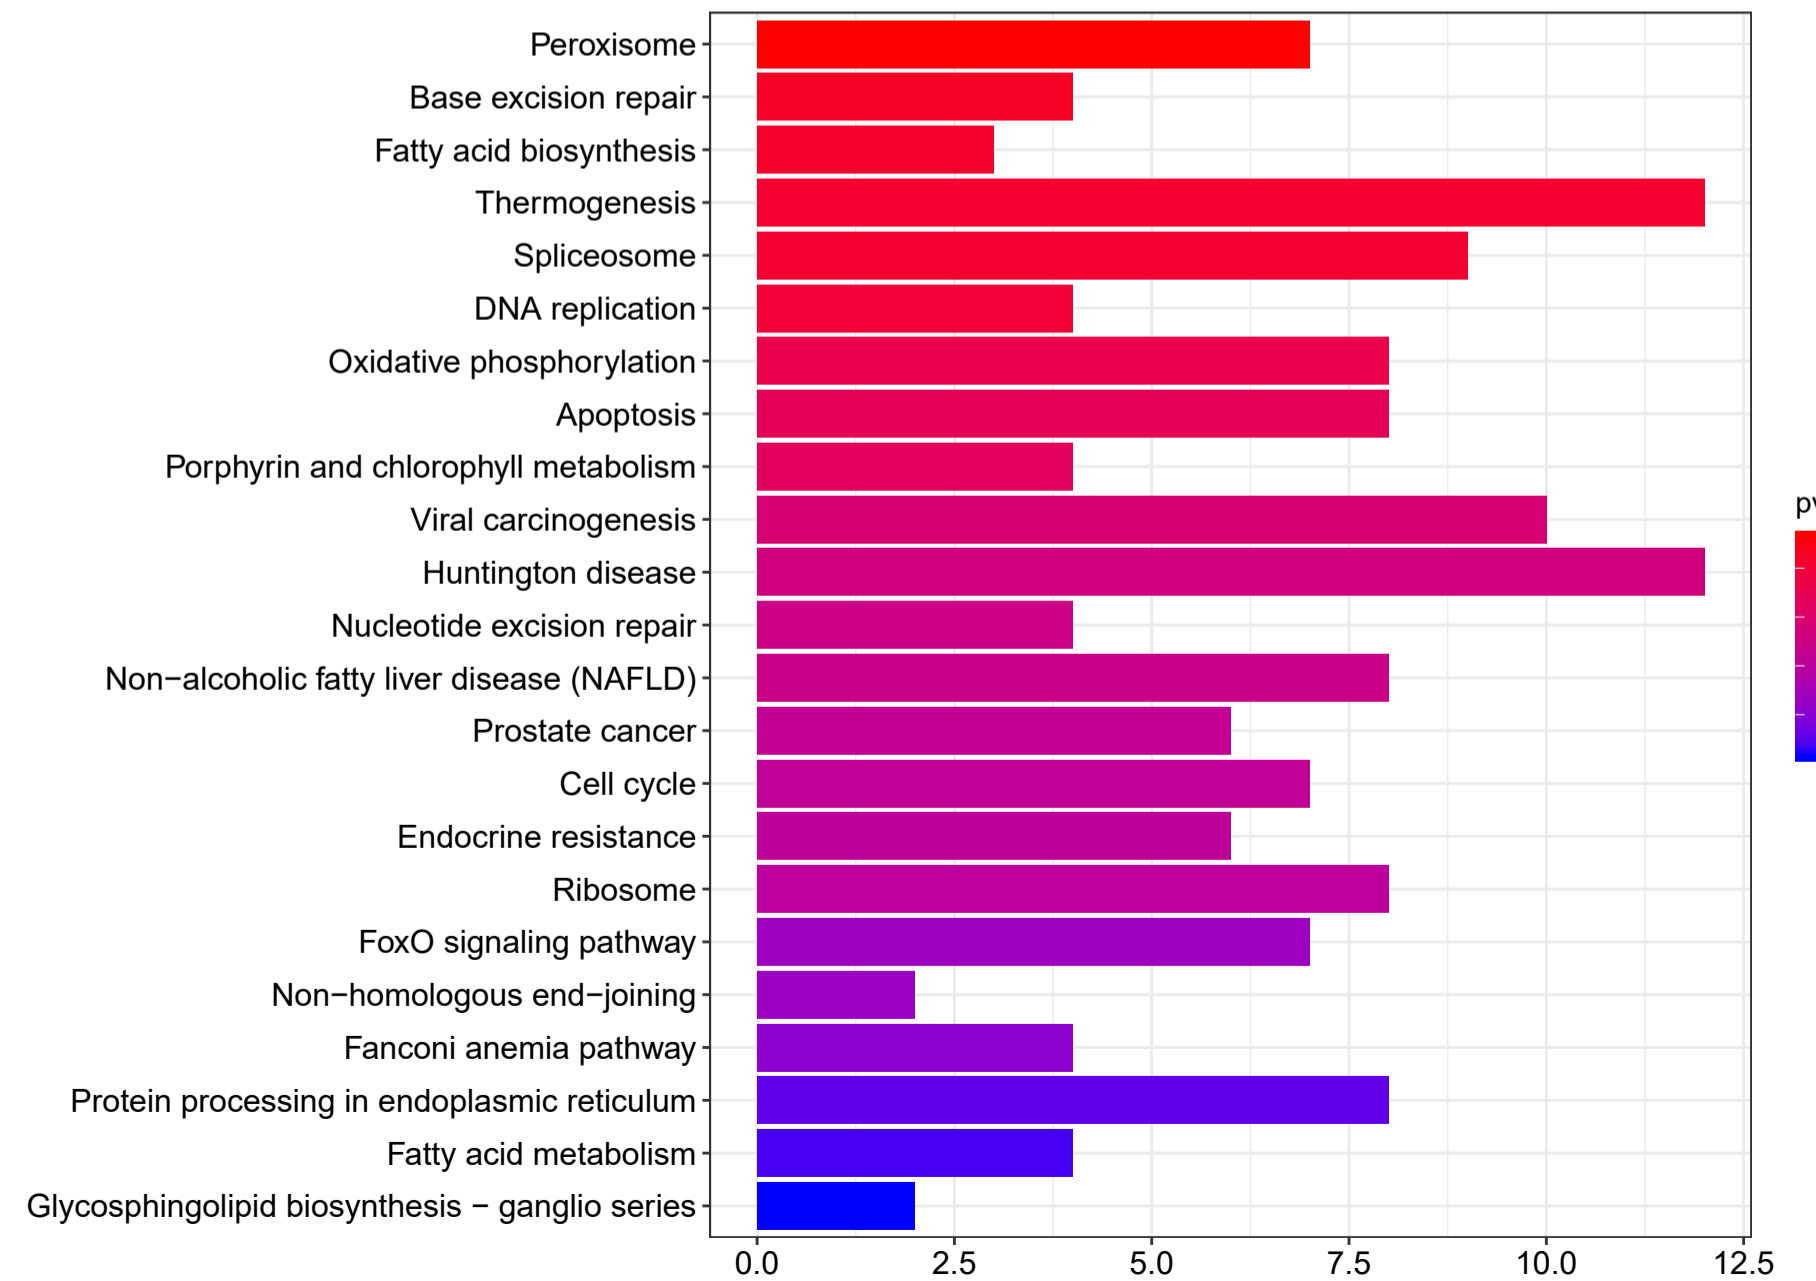

Supplement: MOESM3 [file 18093246]
